# Supplementary material for: Design and synthesis of a new magnetic metal organic framework as a versatile platform for immobilization of acidic catalysts and CO2 fixation reaction
Source: Royal Society of Chemistry journal article supplement (doi:10.1039/d1nj02140k), 2021-01-01
Supplement: d1nj02140k1.pdf [file d1nj02140k1.pdf]

## **Design and synthesis of a new magnetic metal organic framework as a versatile platform for immobilization of acidic catalysts and CO<sub>2</sub> fixation**

Faezeh Taghavi, Amir Khojastehnezhad, Reza Khalifeh, Maryam Rajabzadeh, Fahimeh Rezaei, Khalil Abnous,  
and Seyed Mohammad Taghdisi

| <b>Table of Content</b>                                                | <b>Pages</b> |
|------------------------------------------------------------------------|--------------|
| FT-IR of all steps for catalyst preparation (Figures S1-S5)            | 2-6          |
| TGA plots of catalyst (Figures S6-S8)                                  | 7-9          |
| Nitrogen adsorption–desorption isotherms (Figures S9 and S10)          | 10-11        |
| FT-IR of reused catalyst (Figure S11)                                  | 12           |
| TGA plot of reused catalyst (Figure S12)                               | 13           |
| TEM image of reused catalyst (Figure S13)                              | 14           |
| Data of <sup>1</sup> H-NMR and <sup>13</sup> C-NMR characterization    | 15           |
| Spectra of <sup>1</sup> H-NMR and <sup>13</sup> C-NMR characterization | 16-23        |

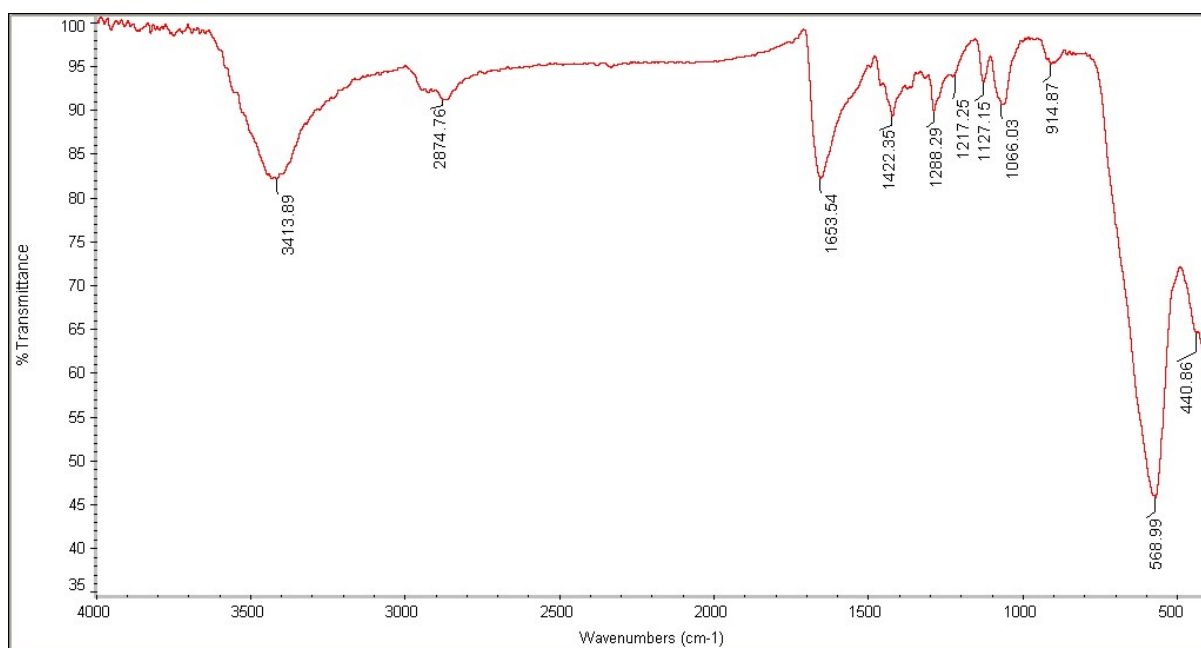

**Fig. S1.** FT-IR of Fe<sub>3</sub>O<sub>4</sub> MNPs

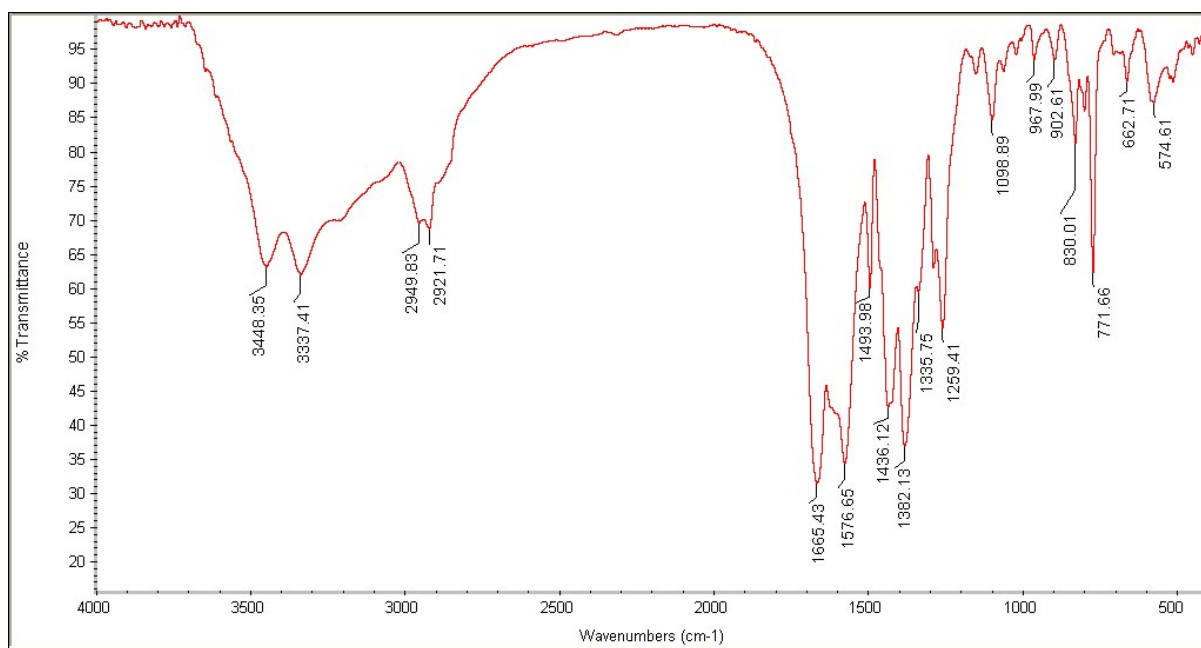

**Fig. S2.** FT-IR of pure IRMOF-3

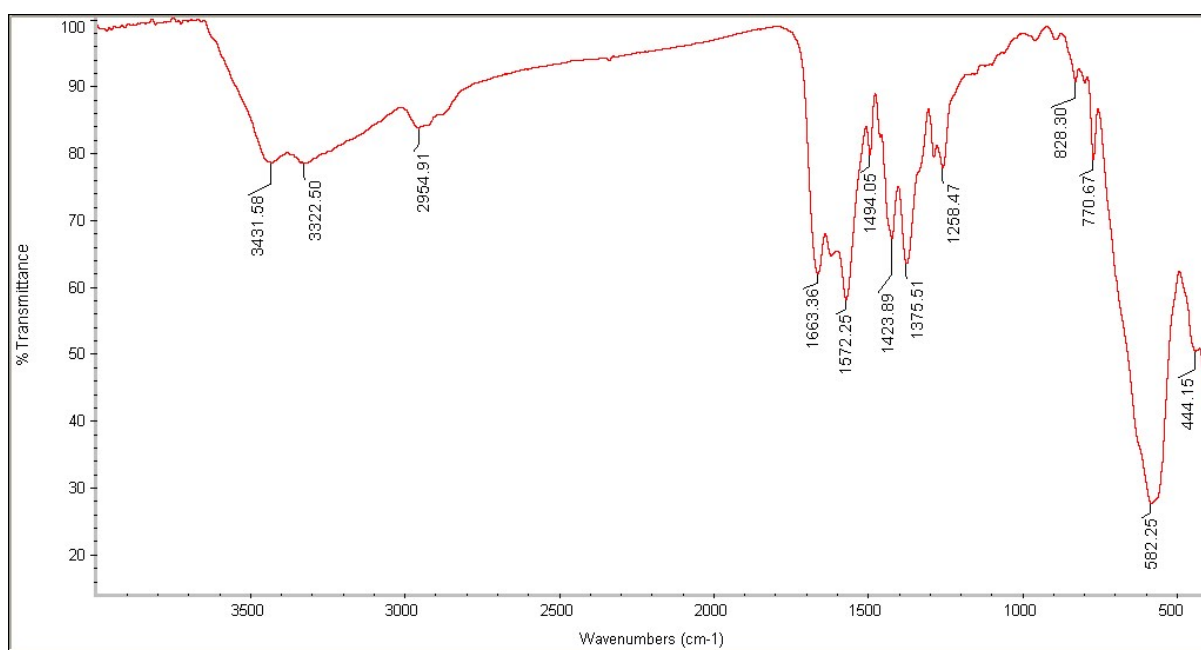

**Fig. S3.** FT-IR of MNP@MOF

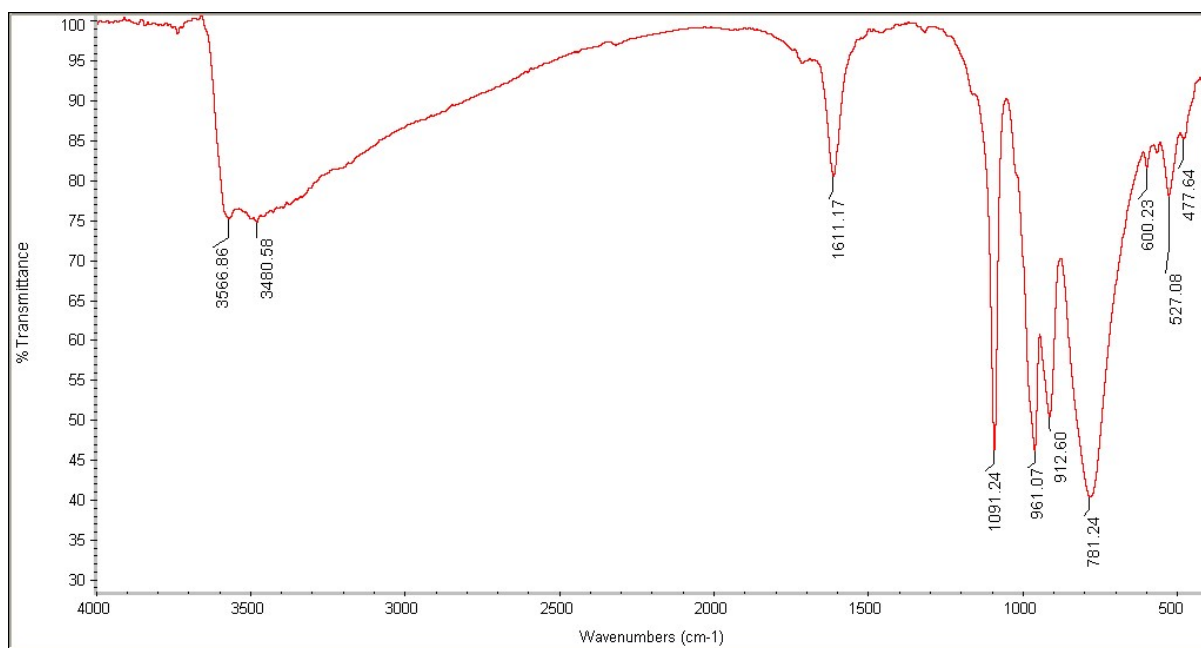

**Fig. S4.** FT-IR of PR HPA

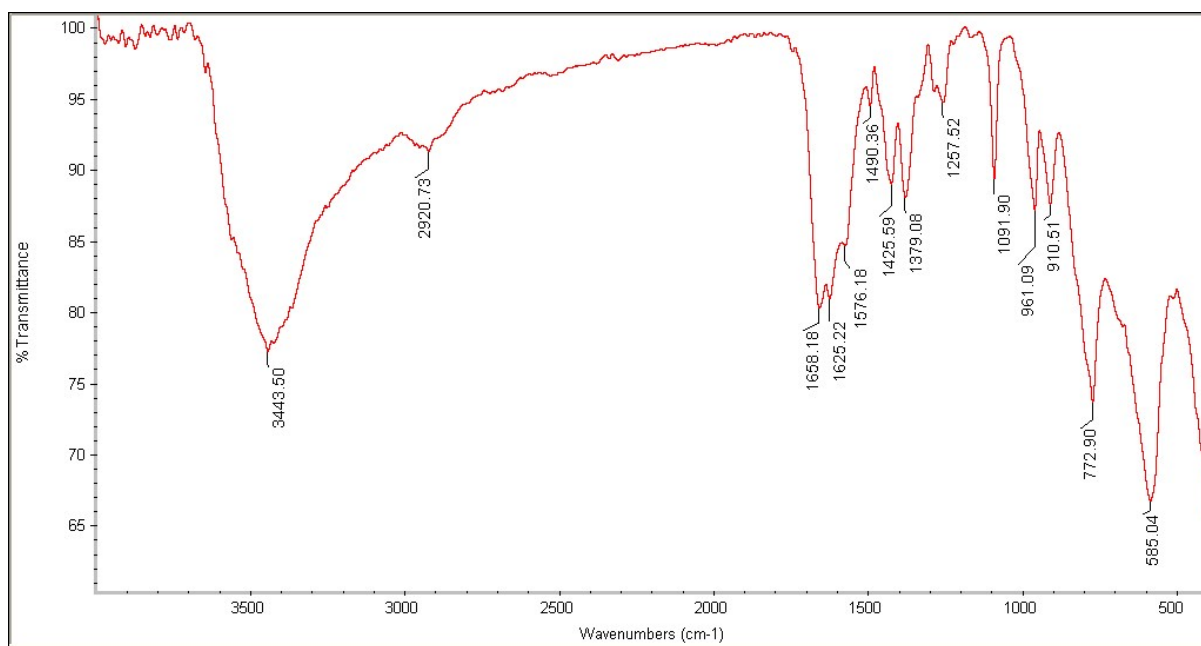

**Fig. S5.** FT-IR of MNP@MOF-PR

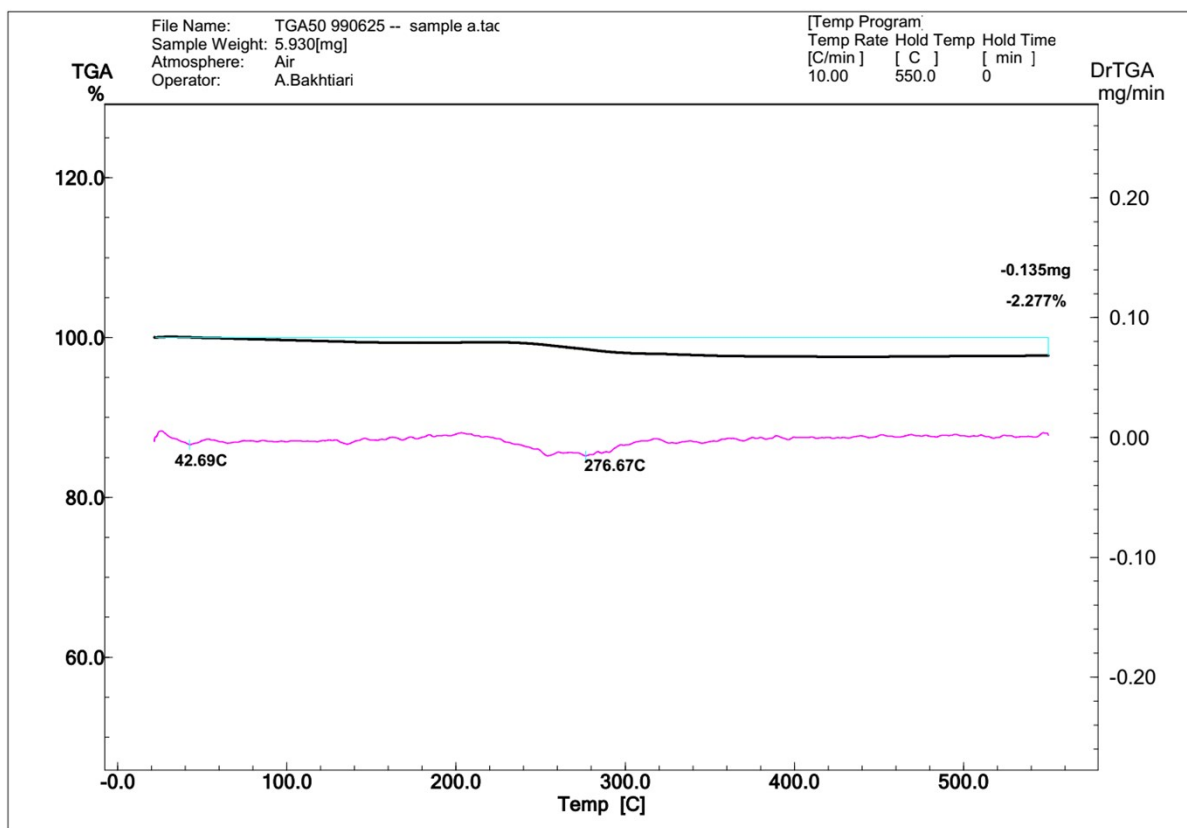

**Fig. S6.** TGA plot of  $\text{Fe}_3\text{O}_4$  MNPs

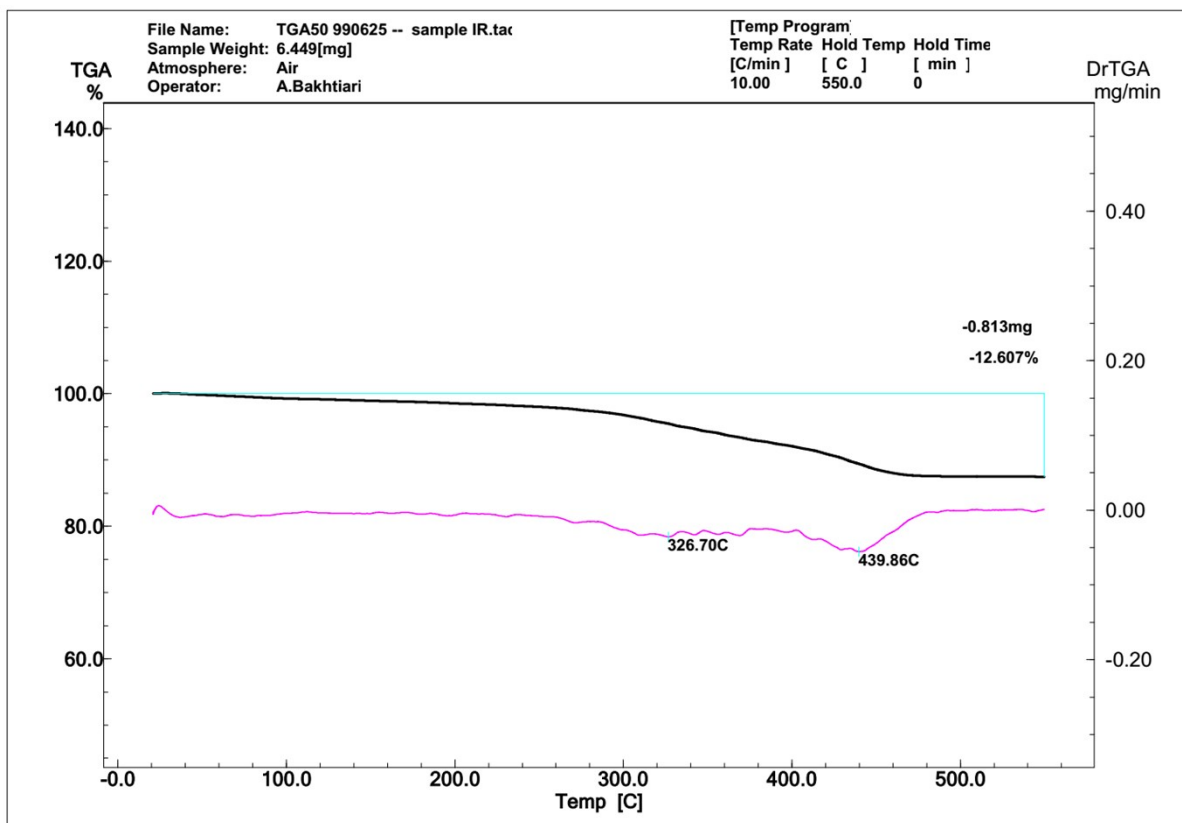

Fig. S7. TGA plot of MNP@MOF



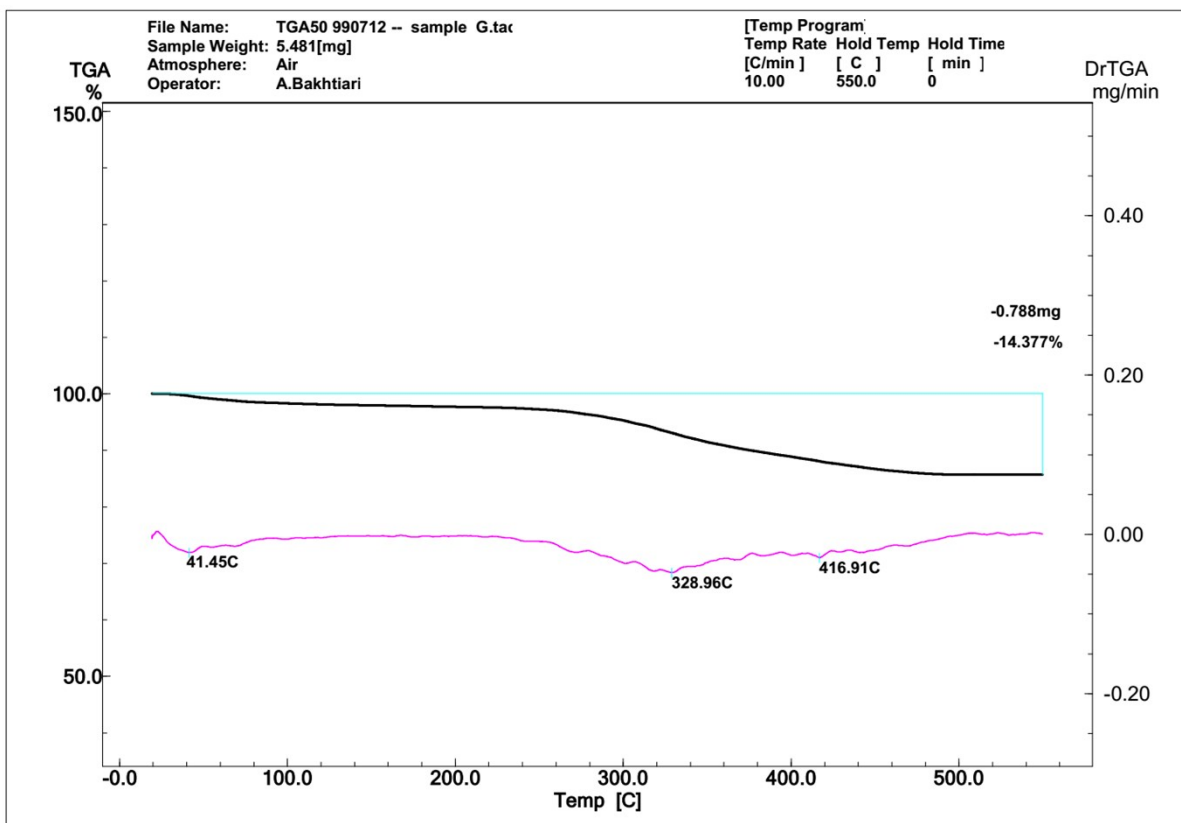

**Fig. S8.** TGA plot of MNP@MOF-PR

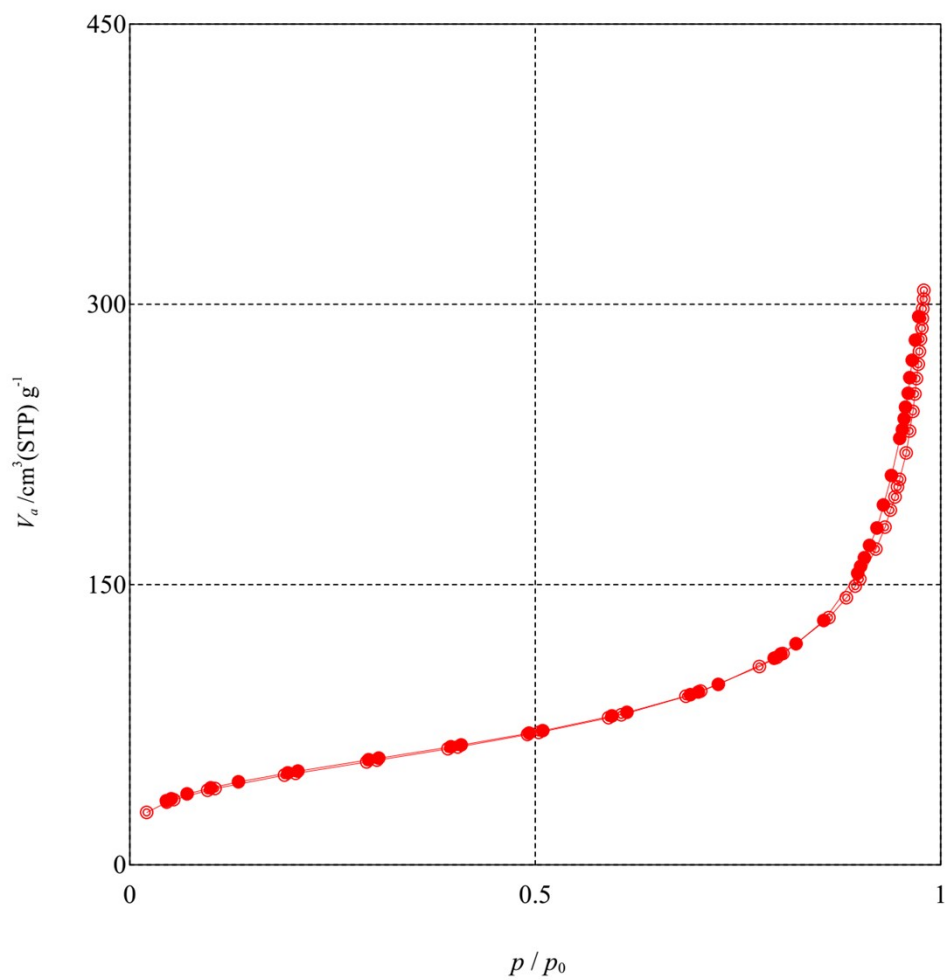

### Adsorption / desorption isotherm

Adsorbate N<sub>2</sub>

Adsorption temperature 77 [K]

**Fig. S9** Nitrogen adsorption–desorption isotherms of MNP@MOF

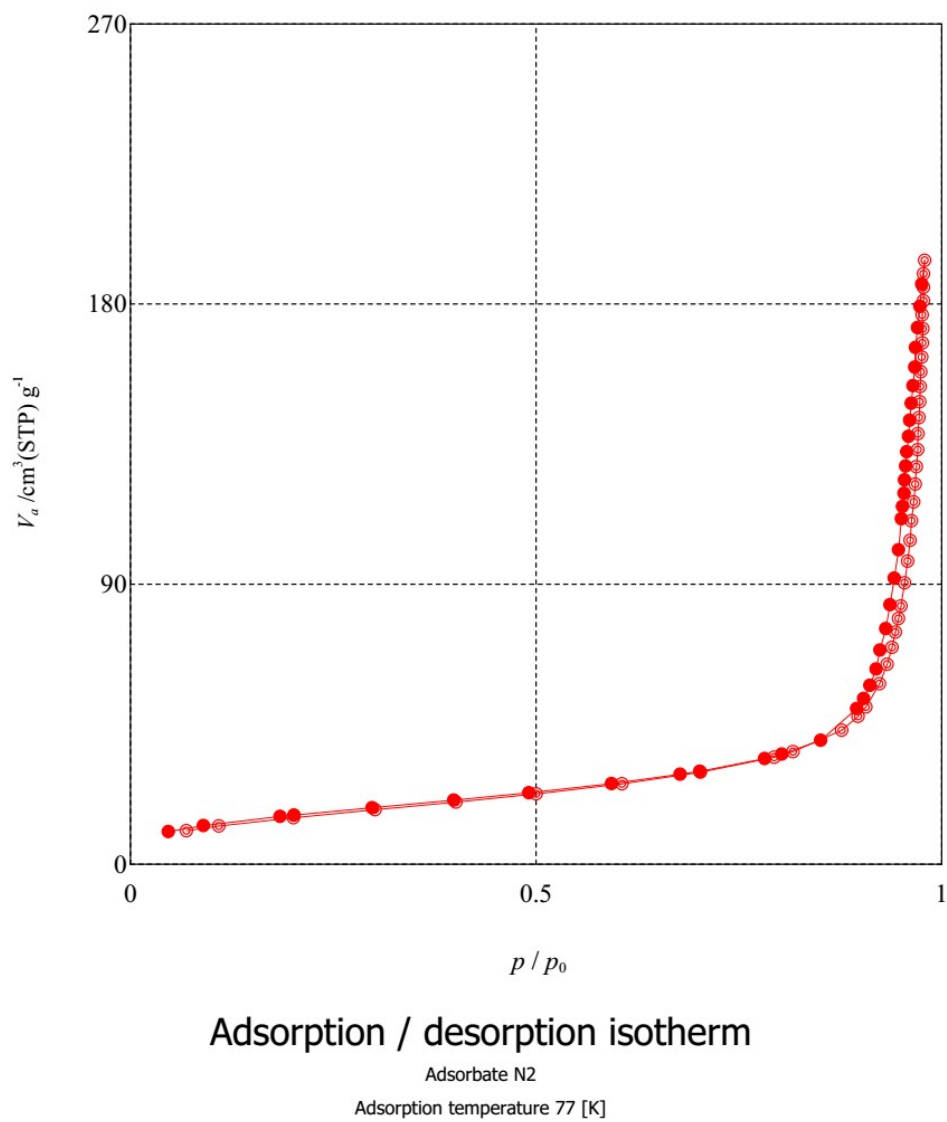

**Fig. S10** Nitrogen adsorption–desorption isotherms of MNP@MOF-PR

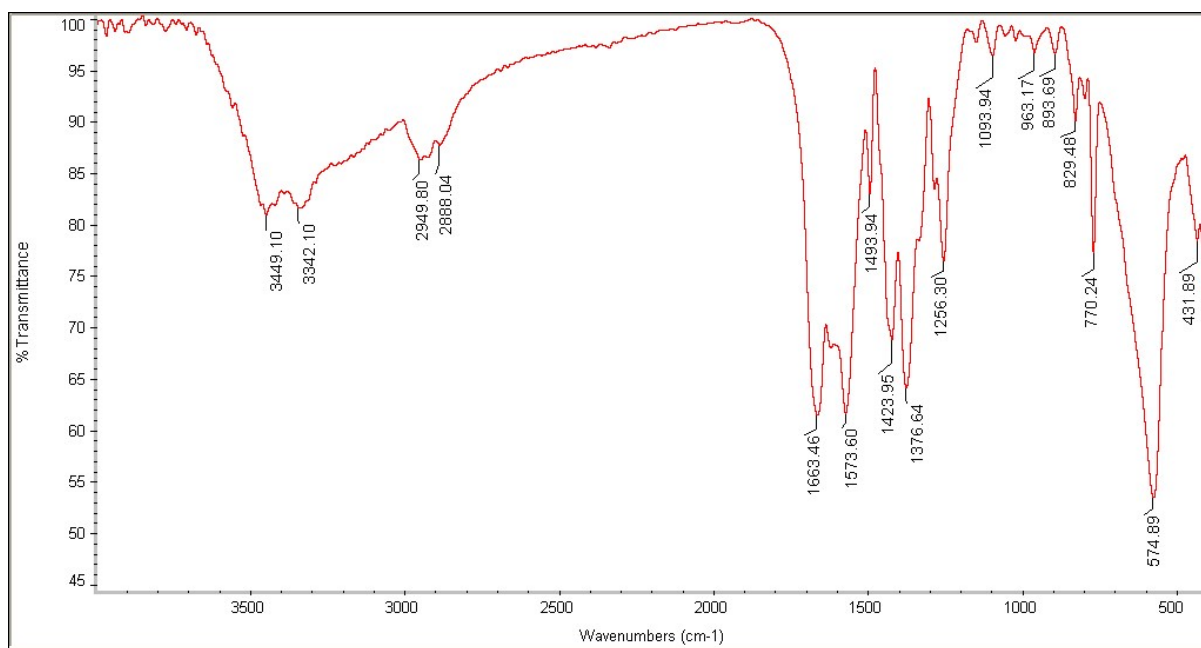

**Fig. S11.** FT-IR of Reused MNP@MOF-PR

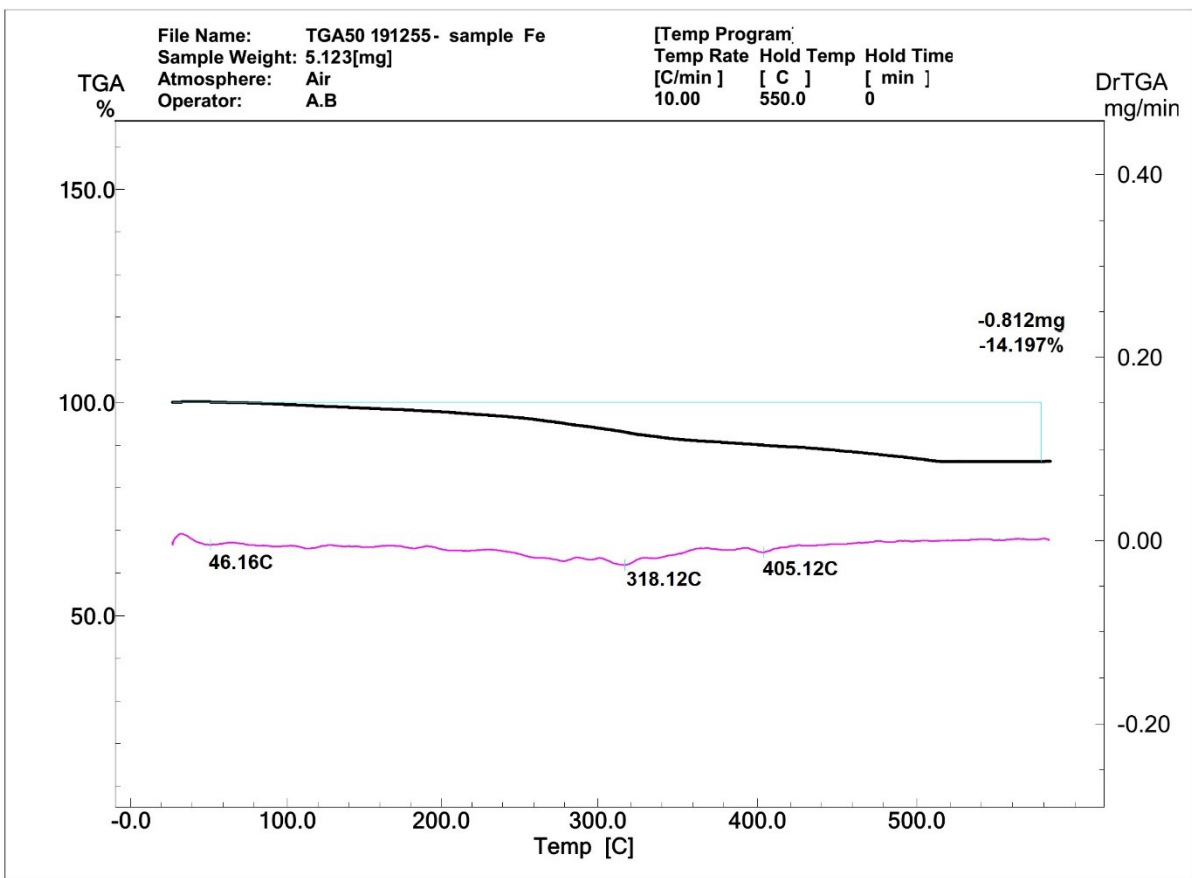

**Fig. S12.** TGA plot of reused MNP@MOF-PR

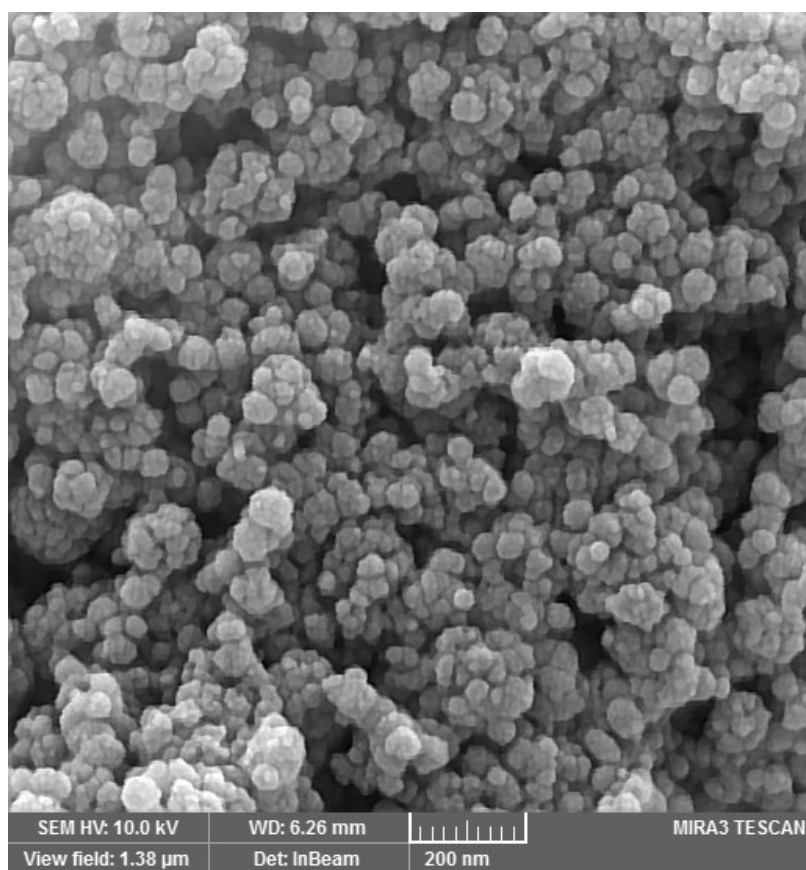

**Fig. S13.** SEM image of reused MNP@MOF-PR

**4-phenyl-1,3-dioxolan-2-one (Table 2, Entry 1)**

<sup>1</sup>H NMR (CDCl<sub>3</sub>, 300 MHz): δ (ppm): 4.33 (t, 1H, *J*= 9Hz), 4.80 (t, 1H, *J*= 9 Hz), 5.68 (t, 1H, *J*= 9Hz), 7.34-7.45 (m, 5H). <sup>13</sup>C NMR (75 MHz, CDCl<sub>3</sub>), δ (ppm): 71.2, 78.0, 125.9, 129.2, 129.7, 135.8, 154.9.

**4-((3,4-dimethylphenoxy)methyl)-1,3-dioxolan-2-one (Table 2, Entry 2)**

<sup>1</sup>H NMR (CDCl<sub>3</sub>, 300 MHz): δ (ppm): 2.21 (d, 6H, *J*= 9Hz), 4.04-4.21 (m, 2H), 4.46- 4.60 (m, 2H), 4.96-5.03 (m, 1H), 6.62-7.26 (m, 3H). <sup>13</sup>C NMR (CDCl<sub>3</sub>, 100 MHz): δ (ppm): 18.9, 19.9, 66.3, 67.2, 74.7, 111.5, 116.3, 129.9, 130.5, 138.0, 155.2, 156.2.

**4-((4-isopropylphenoxy) methyl)-1,3-dioxolan-2-one (Table 2, Entry 3)**

<sup>1</sup>H NMR (CDCl<sub>3</sub>, 100 MHz): δ (ppm): 1.22 (d, 6H, *J*=6Hz), 2.82-2.93 (m, 1H), 4.12-4.24 (m, 2H), 4.51-4.60 (m, 2H), 4.98-5.05 (m, 1H), 6.84 (d, 2H, *J*= 6), 7.15 (d, 1H, *J*= 9). <sup>13</sup>C NMR (CDCl<sub>3</sub>, 75 MHz): δ (ppm): 24.2, 33.3, 66.3, 67.0, 74.4, 114.5, 127.5, 142.4, 154.9, 155.9.

**4-((4-bromophenoxy) methyl)-1,3-dioxolan-2-one (Table 2, Entry 4)**

<sup>1</sup>H NMR (CDCl<sub>3</sub>, 300 MHz): δ (ppm): 4.08-4.24 (m, 2H), 4.50-4.65 (m, 2H), 4.99-5.08 (m, 1H), 6.79 (d, 2H, *J*= 9 Hz), 7.40 (d, 2H, *J*= 9 Hz). <sup>13</sup>C NMR (CDCl<sub>3</sub>, 75 MHz): δ (ppm): 66.1, 67.2, 74.0, 114.3, 116.4, 132.5, 154.6, 156.9.

**4-(phoxymethyl)-1,3-dioxolan-2-one (Table 2, Entry 5)**

<sup>1</sup>H NMR (CDCl<sub>3</sub>, 300 MHz): δ (ppm): 4.05-4.20 (m, 2H), 4.45-4.58 (m, 2H), 4.93-4.99 (m, 1H), 6.84 (d, 2H, *J*= 9 Hz), 6.95 (t, 1H, *J*= 9 Hz), 7.24 (t, 2H, *J*= 9 Hz). <sup>13</sup>C NMR (75 MHz, CDCl<sub>3</sub>), δ (ppm): 66.2, 66.8, 74.1, 114.6, 122.0, 129.7, 154.6, 157.7.

**(2-oxo-1,3-dioxolan-4-yl)methyl methacrylate (Table 2, Entry 6)**

<sup>1</sup>H NMR (CDCl<sub>3</sub>, 300 MHz): δ (ppm): 1.88 (s, 3H), 4.23-4.40 (m, 3H), 4.53 (t, 1H, *J*= 9 Hz), 4.90-4.97 (m, 1H), 5.60 (s, 1H), 6.08 (s, 1H). <sup>13</sup>C NMR (75 MHz, CDCl<sub>3</sub>), δ (ppm): 18.1, 63.4, 66.1, 73.8, 127.3, 135.1, 154.5, 166.7.

**4-(chloromethyl)-1,3-dioxolan-2-one (Table 2, Entry 8)**

<sup>1</sup>H NMR (CDCl<sub>3</sub>, 300 MHz): δ (ppm): 3.75 (dd, 2H, *J*<sub>1</sub>= 21 Hz, *J*<sub>2</sub>= 9 Hz), 4.37 (d, 1H, *J*= 6Hz), 4.57 (t, 1H, *J*= 6 Hz), 5.00 (s, 1H). <sup>13</sup>C NMR (75 MHz, CDCl<sub>3</sub>), δ (ppm): 44.8, 63.4, 73.9, 154.6.

**hexahydrobenzo[d][1,3]dioxol-2-one (Table 2, Entry 9)**

<sup>1</sup>H NMR (CDCl<sub>3</sub>, 300 MHz): δ (ppm): 1.28-1.34 (m, 2H), 1.42-1.46 (m, 2H), 1.71-1.77 (m, 4H), 4.59 (s, 2H). <sup>13</sup>C NMR (75 MHz, CDCl<sub>3</sub>), δ (ppm): 18.9, 26.2, 74.7, 155.2.

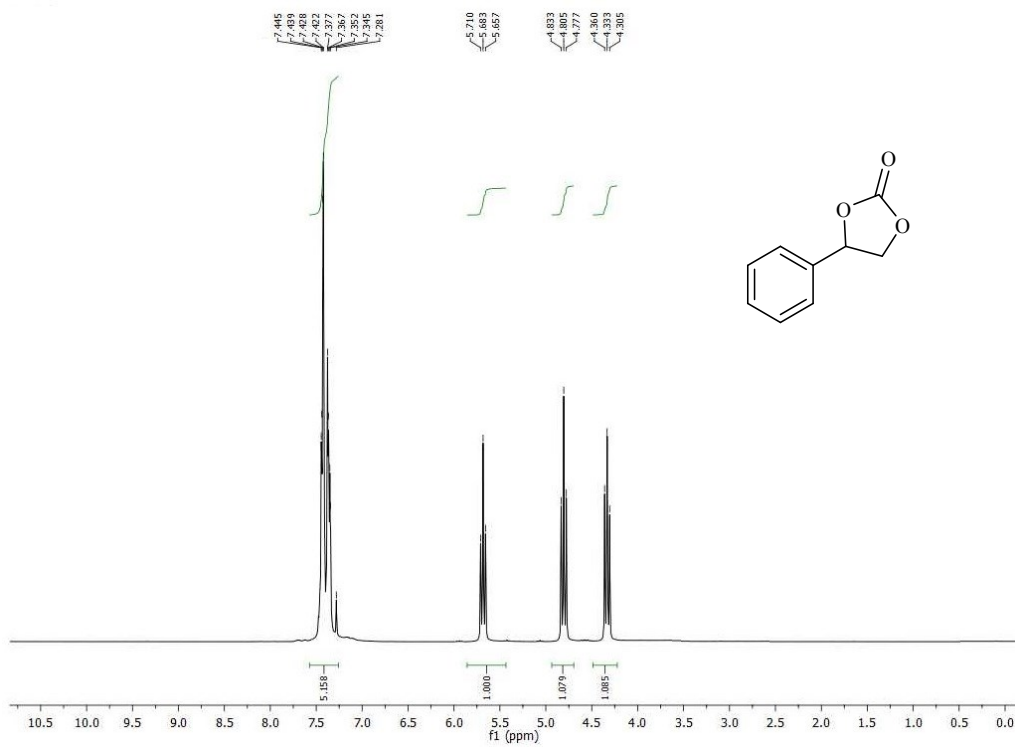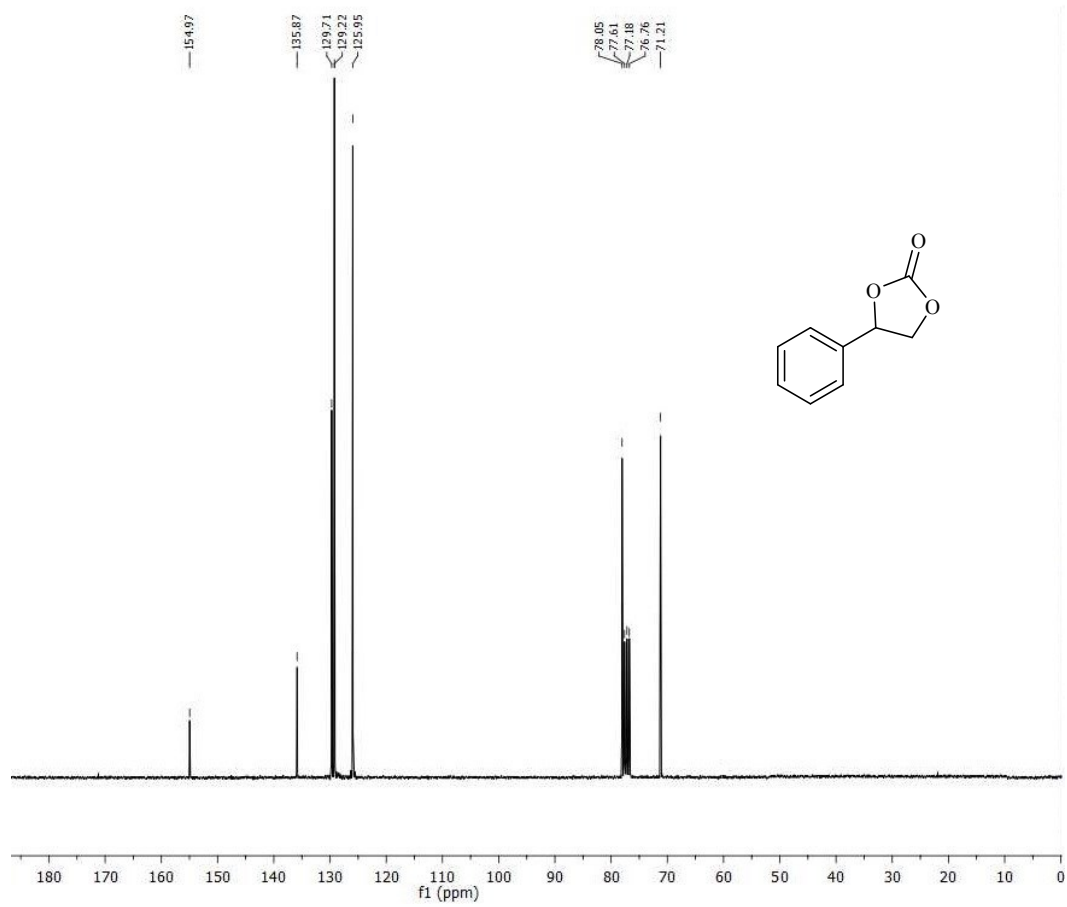

NMR spectrum of (Table 2, Entry 1)



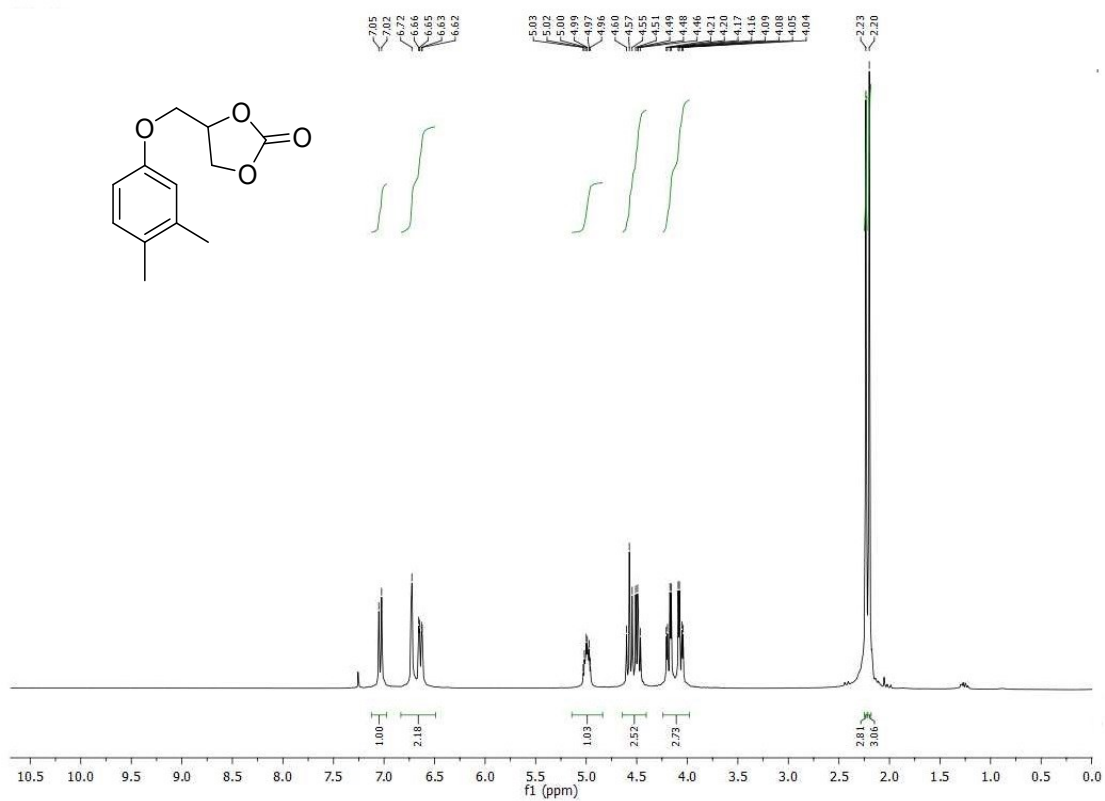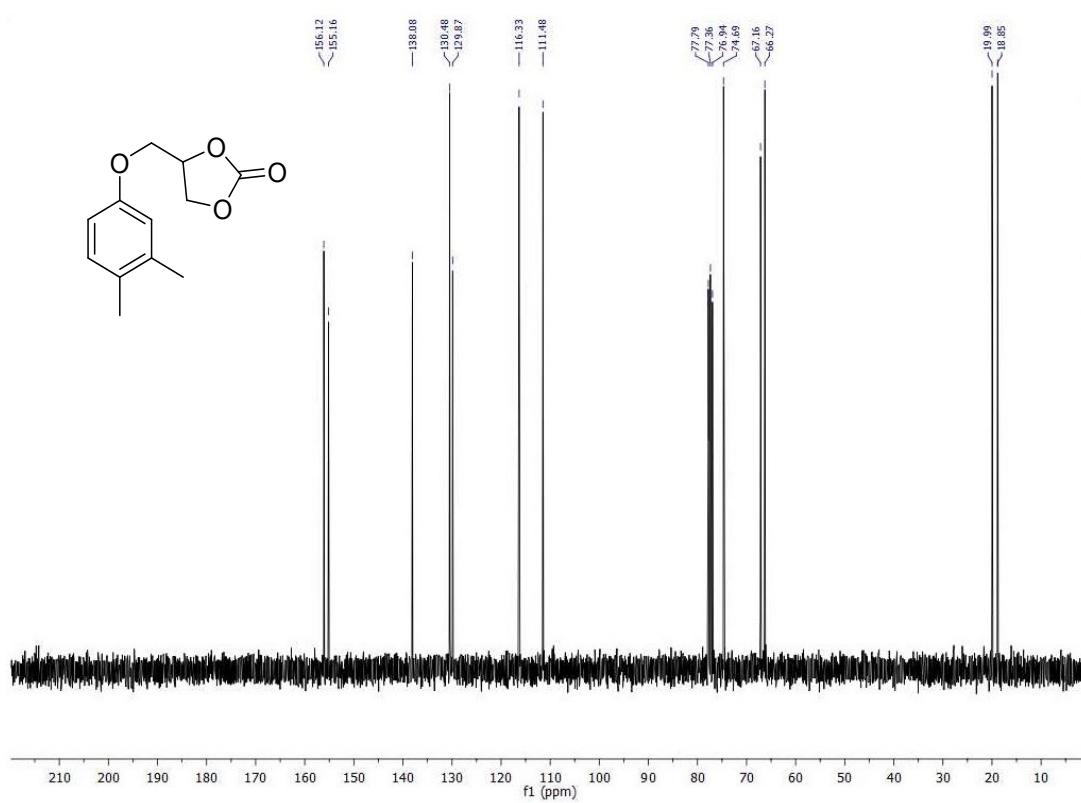

NMR spectrum of (Table 2, Entry 2)

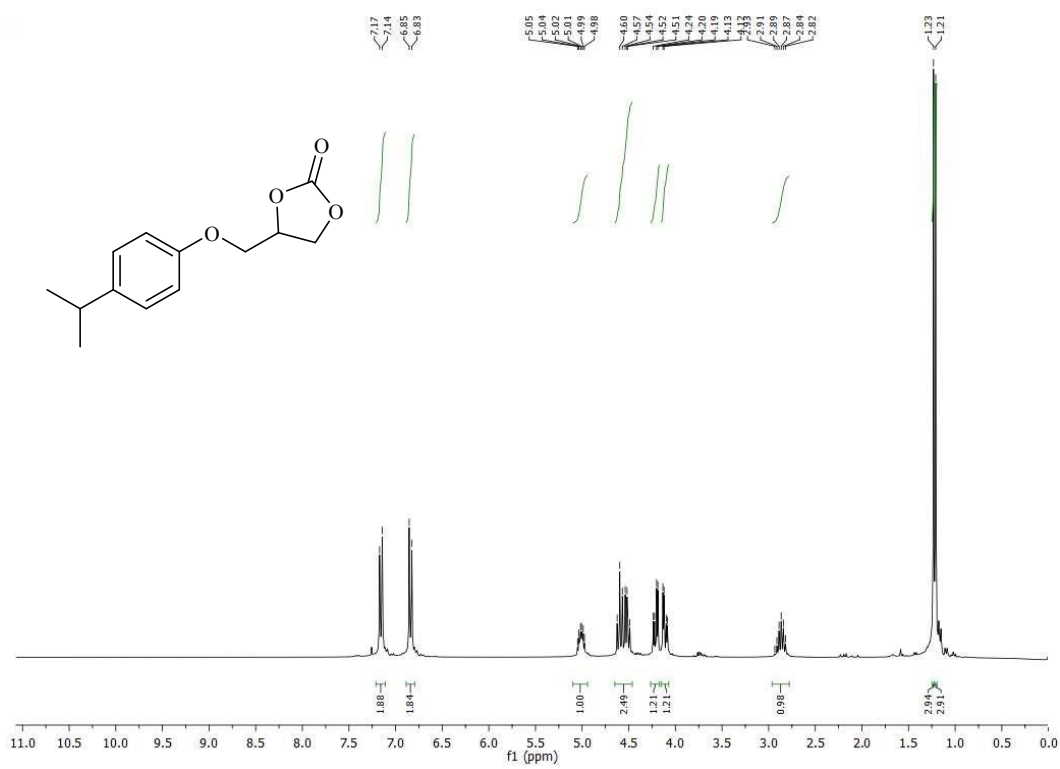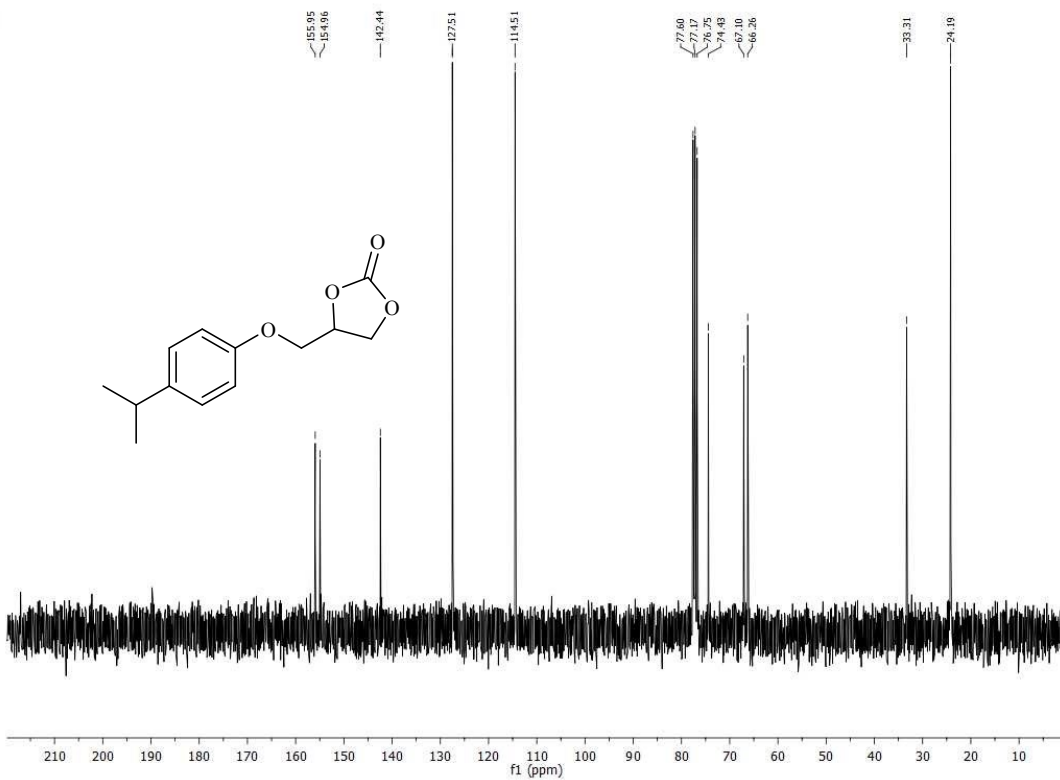

NMR spectrum of (Table 2, Entry 3)

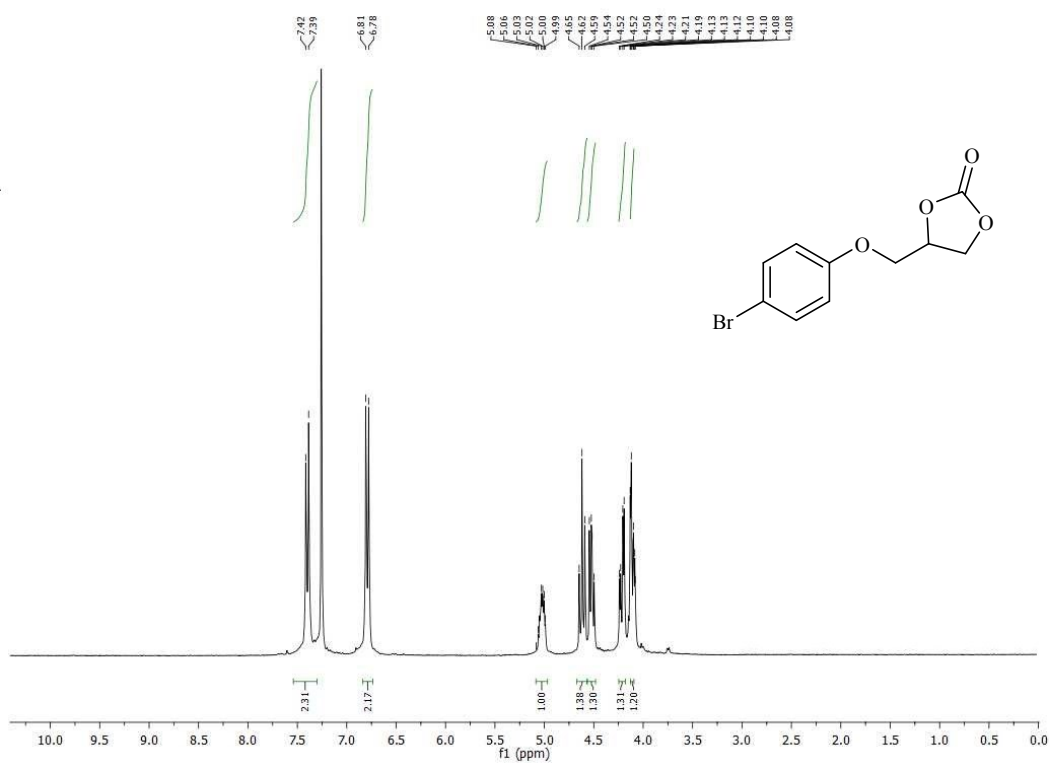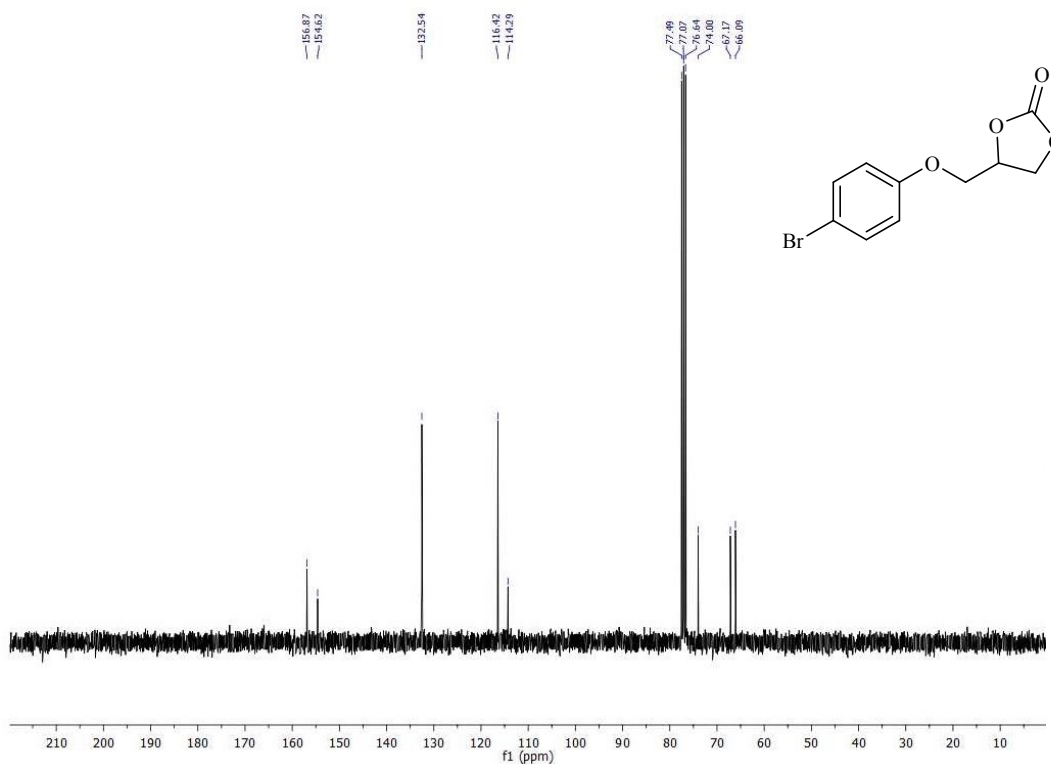

NMR spectrum of (Table 2, Entry 4)

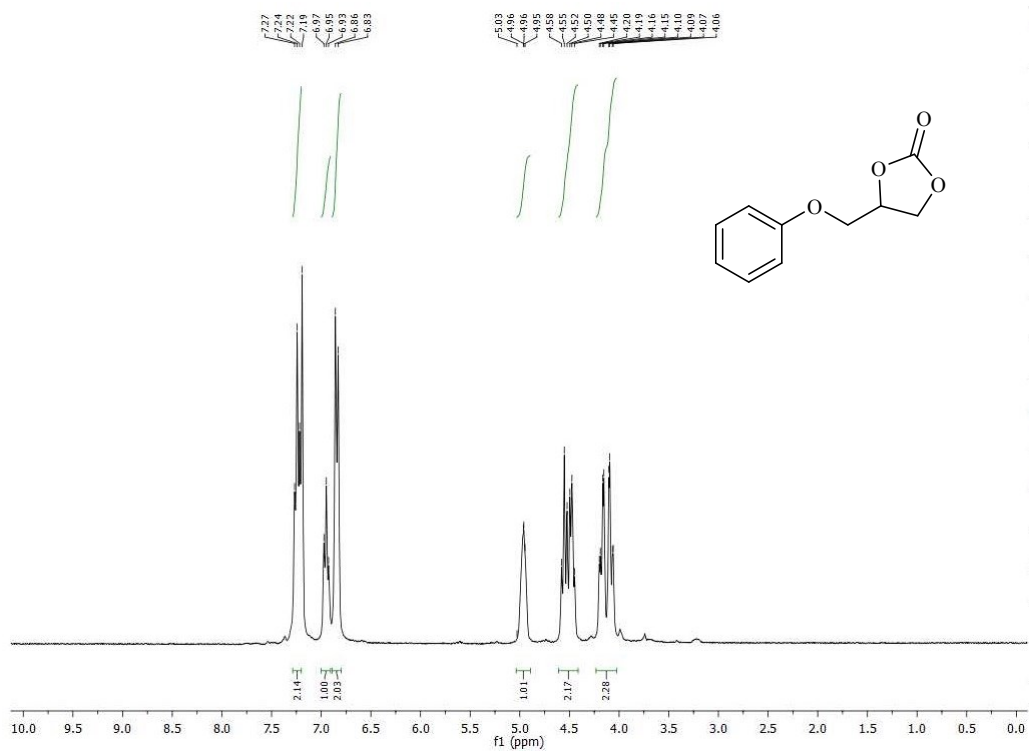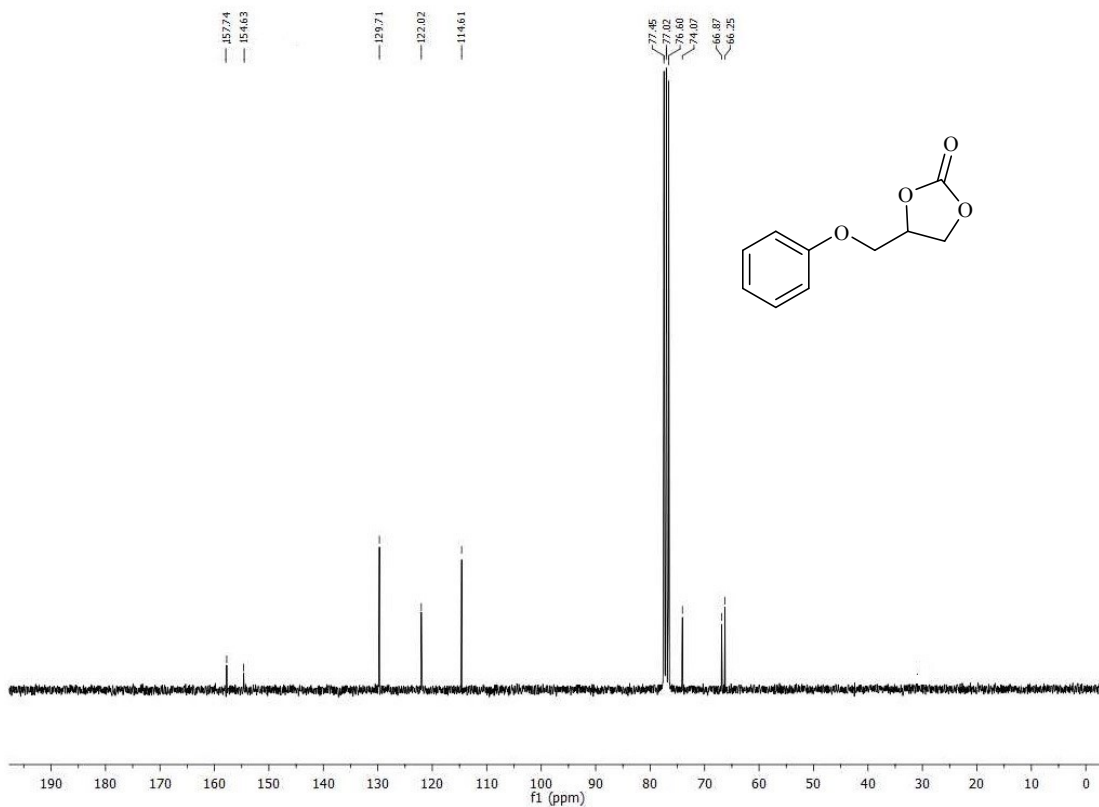

NMR spectrum of (Table 2, Entry 5)

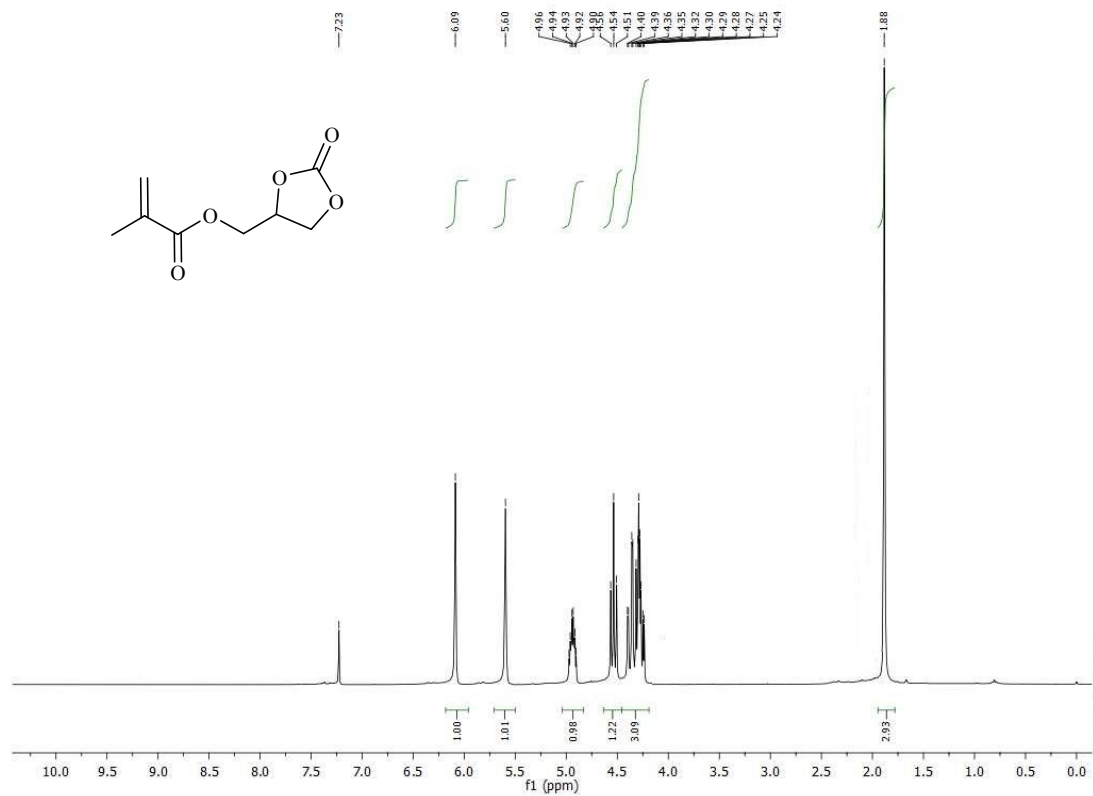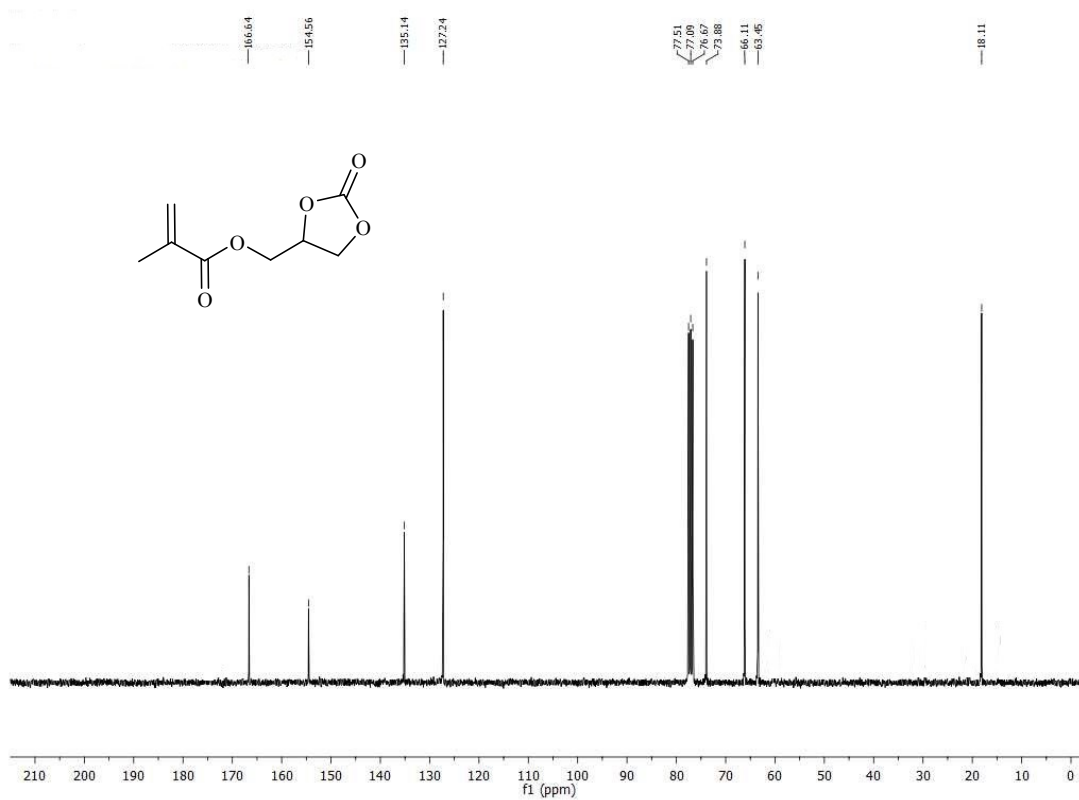

NMR spectrum of (Table 2, Entry 6)

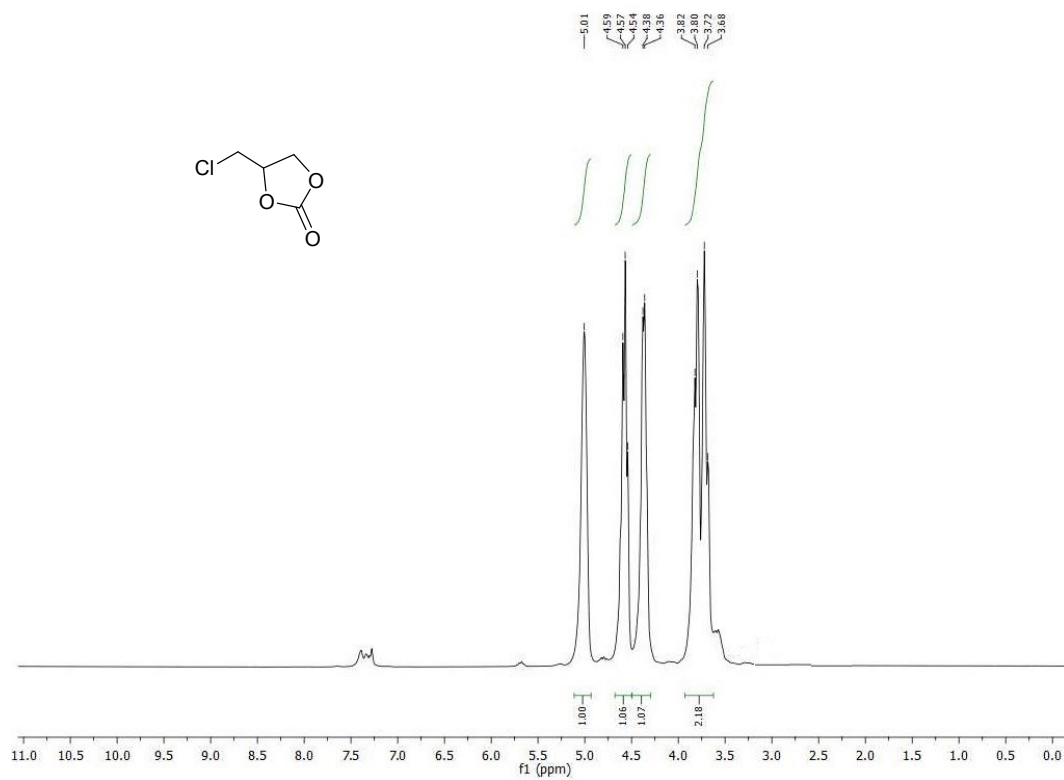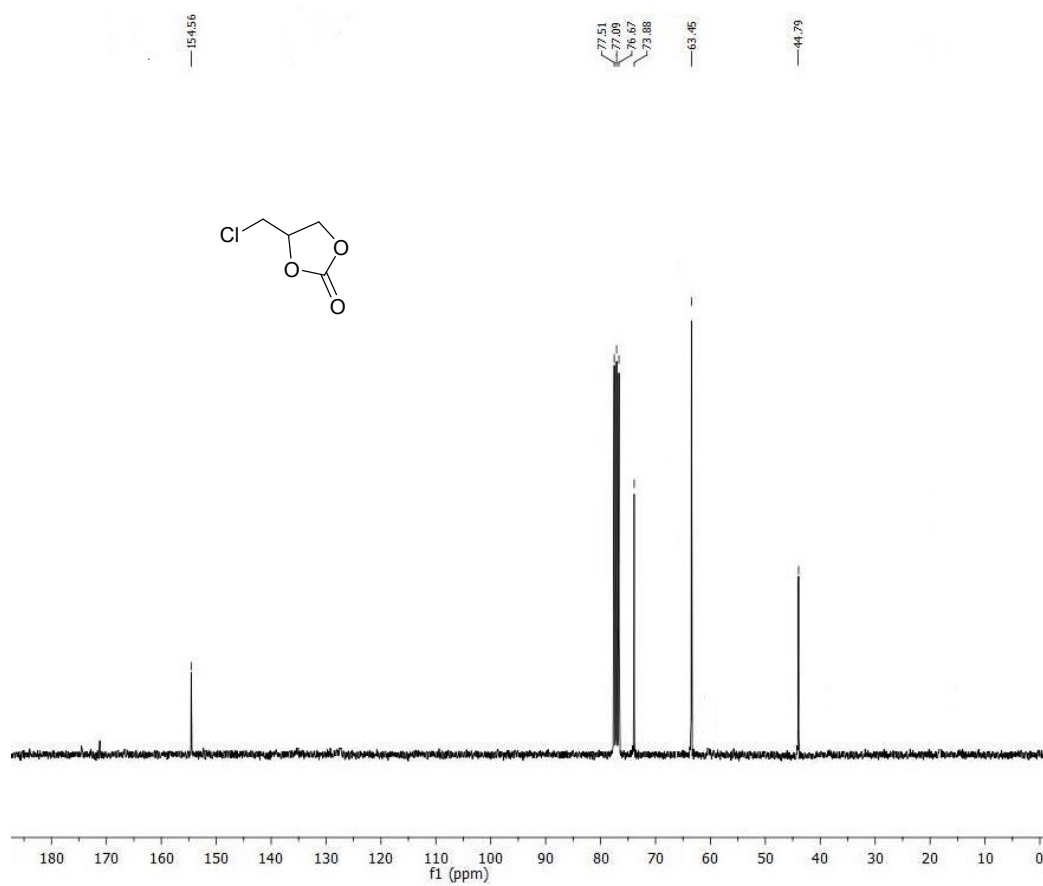

NMR spectrum of (Table 2, Entry 8)

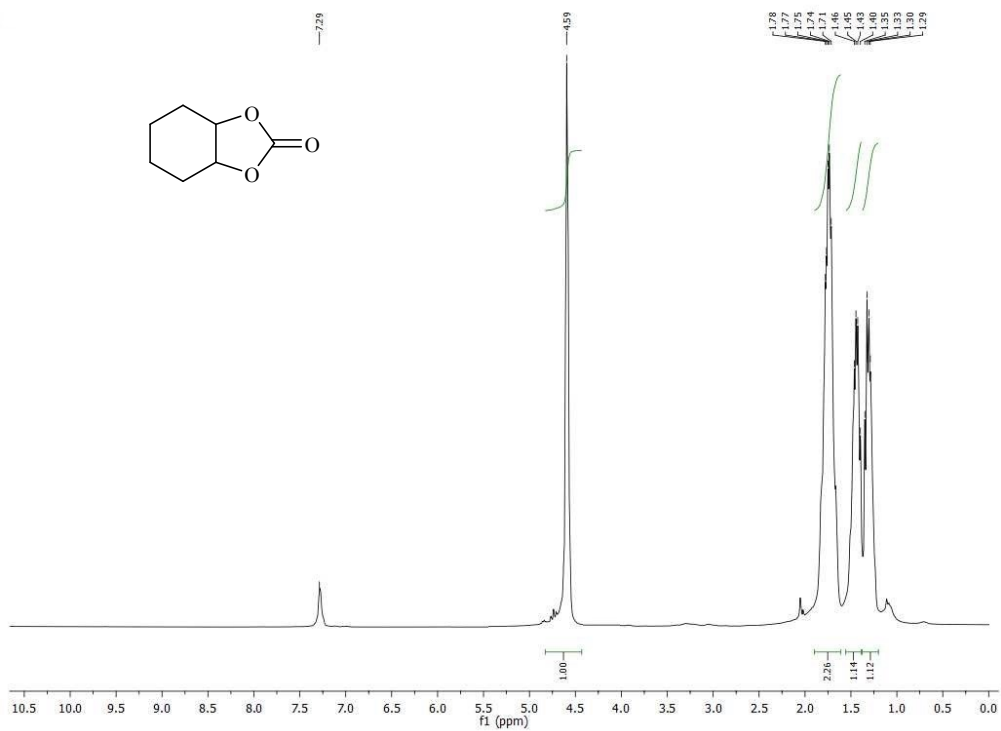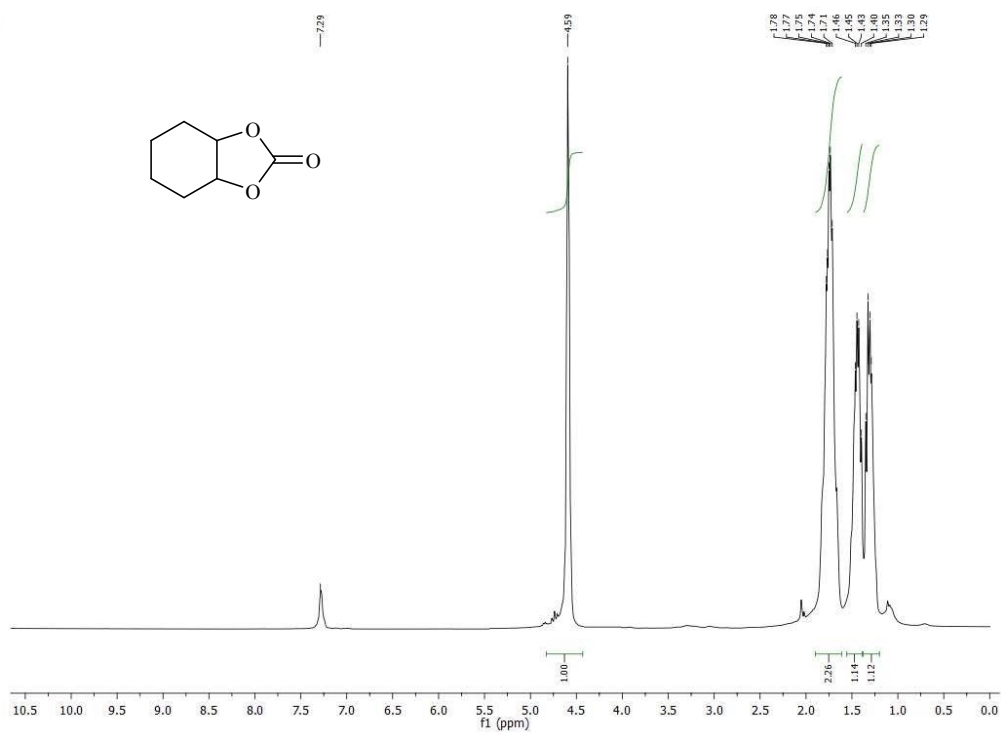

NMR spectrum of (Table 2, Entry 9)
